# Supplementary material
Source: PubMed Central journal article supplement (PMC4538467)
Supplement: AAC.00375-15_zac009154298so1.pdf [file AAC.00375-15_zac009154298so1.pdf]

**Table S1.** Susceptibility of the isolate

| Antimicrobial agent     | Inhibition zone diameter, mm | Interpretation <sup>a</sup> |
|-------------------------|------------------------------|-----------------------------|
| Ampicillin              | 6                            | resistant                   |
| Cefuroxime              | 6                            | resistant                   |
| Cefotaxime              | 6                            | resistant                   |
| Ceftazidime             | 6                            | resistant                   |
| Ertapenem               | 23                           | sensitive                   |
| Imipenem                | 20                           | intermediate                |
| Meropenem               | 23                           | sensitive                   |
| Amoxicillin-clavulanate | 6                            | resistant                   |
| Piperacillin-tazobactam | 20                           | intermediate                |
| Amikacin                | 23                           | sensitive                   |
| Gentamicin              | 6                            | resistant                   |
| Chloramphenicol         | 20                           | sensitive                   |
| Ciprofloxacin           | 29                           | sensitive                   |
| Fosfomycin              | 6                            | resistant                   |
| Sufisoxazole            | 25                           | sensitive                   |
| Tetracycline            | 18                           | sensitive                   |
| Trimethoprim            | 6                            | resistant                   |

<sup>a</sup> according to the Clinical Laboratory Standards Institute (1).

**Table S2.** Primers used in the study

| Primer | Our primer name   | Target                     | Nucleotide sequence (5' to 3') | Position in GenBank entry for pCRE623 |
|--------|-------------------|----------------------------|--------------------------------|---------------------------------------|
| 1      | pCTX-M3 56725-F   | IncL/M scaffold            | GGTGAAGACAGGGGAATGTT           | 2393-2412                             |
| 2      | IS110-942F        | Multidrug-resistant region | CAGAGCACAGGTGACGAC             | 2816-2833*                            |
| 3      | IS5075-340F       | Multidrug-resistant region | GTTGATGCTGAAGCTATCTG           | c3484-3465*                           |
| 4      | IS110-80R         | Multidrug-resistant region | GCCTTCCCACGATGATCCTG           | 3678-3697                             |
| 5      | IS shell 7154B    | Multidrug-resistant region | TCACCGTGCCCTGCTTGA             | 4318-4335                             |
| 6      | pCRE623 contig14R | Multidrug-resistant region | GCAGCTCTGTTACCTGCGCT           | 7472-7453                             |
| 7      | pCRE623 contig14F | Multidrug-resistant region | ACGTCAGAAGCCGACTGCAC           | 8698-8717                             |
| 8      | Int461F           | Multidrug-resistant region | GGGTCAAGGATCTGGATTTC           | c9425-9406*                           |
| 9      | Int-F             | Multidrug-resistant region | GCCACTGCGCCGTTACCACC           | c9876-9857*                           |
| 10     | fosC2-F125        | Multidrug-resistant region | TGGAGGCTACTTGGATTTG            | 10168-10186                           |
| 11     | fosC2-R341        | Multidrug-resistant region | AGGCTACCGCTATGGATTT            | c10384-10366                          |
| 12     | IMP-578R          | Multidrug-resistant region | GCT TCTADATTTGCGTCAC           | 11109-11091                           |
| 13     | TniA5255F         | Multidrug-resistant region | CGTGAATCATCTGCATCG             | 15045-15062                           |
| 14     | pCRE623 Contig13R | Multidrug-resistant region | GGATGACGAAGAACGATTTCG          | 16340-16359                           |
| 15     | aaCC2-2           | Multidrug-resistant region | CTCCGTCAGCGTTTCAGCTA           | 17825-17842                           |
| 16     | aacC2-1           | Multidrug-resistant region | ACTGTGATGGGATACGCGTC           | 18061-18042                           |
| 17     | pHKU1 tnpA-281F   | Multidrug-resistant region | ACAATGGGCATCGTATTGCC           | 18643-18624                           |
| 18     | IS10-F            | Multidrug-resistant region | GACTGGTCTGATATCCGTGA           | 18651-18670                           |
| 19     | IS10-R            | Multidrug-resistant region | CAGGTAAGTTAGTTGCTAGAA          | c19179-19159                          |
| 20     | IS10-1034F        | Multidrug-resistant region | AGCCGAACGAGCAGCTCA             | 19290-19307                           |
| 21     | pCRE623 contig18F | Multidrug-resistant region | CATGTGTCAGTCGTCCGT             | c20939-20922                          |
| 22     | pCRE623 contig18R | Multidrug-resistant region | TGTTGAAGCTCAAGGCCG             | 21523-21540                           |
| 23     | uvp130B           | Multidrug-resistant region | TGCAAGGCCTGAGCGCGT             | 22527-22510                           |
| 24     | pHKU1 uvp1 511F   | Multidrug-resistant region | TTGCTAAGCGCTTCAACGTT           | 22637-22656                           |
| 25     | IncN repE 22-F    | Multidrug-resistant region | TCCTTGATCCTGCACTCAAG           | c23577-23557*                         |
| 26     | N RV              | Multidrug-resistant region | GTTTCAACTCTGCCAAGTTC           | 23584-23603                           |
| 27     | N FW              | Multidrug-resistant region | GTCTAACGAGCTTACCGAAG           | 24143-24124                           |
| 28     | contig11F         | Multidrug-resistant region | ACGTTATCAGGCATGGCG             | 25786-25803                           |

|    |                      |                            |                        |                  |
|----|----------------------|----------------------------|------------------------|------------------|
| 29 | IS3-70B              | Multidrug-resistant region | ATCTGACGCAACTTGACGGC   | 26765-26746      |
| 30 | strA31B              | Multidrug-resistant region | ACCGGTTGTGTTCCGGTCTA   | c27834-27815     |
| 31 | Tn3-120F             | Multidrug-resistant region | TAAGTTTCGTCGGCTGAGGC   | 46381-46400      |
| 32 | IS903 reverse 5'     | Multidrug-resistant region | CATCATCCAGCCAGA AAG TT | 46706-46725      |
| 33 | DMT-366F             | Multidrug-resistant region | GCTATTTGCGGAACTGCG     | 50050-50067      |
| 34 | Int1-285B            | Multidrug-resistant region | GCACAGCACCTTGCCGTAGAA  | 52236-52256      |
| 35 | pCRE623 dfrA14 41B   | Multidrug-resistant region | TTCGCTTTCGCAGCCATC     | 52707-52690      |
| 36 | IS6100F              | Multidrug-resistant region | CTGCCACGCTCAATACCGA    | 54170-54188      |
| 37 | pHKU1-insB-159F      | Multidrug-resistant region | AGACAACATCTGGCAAGGCT   | 57749-57768      |
| 38 | pKPS30 mphA 236B     | Multidrug-resistant region | ATTCTTGAGCATTGCCAGCAC  | 59248-59228      |
| 39 | mphR(A) 461F         | Multidrug-resistant region | GATGCAGTGGGCCGTCGATC   | 61625-61644      |
| 40 | pCRE623 contig6R     | Multidrug-resistant region | ACGCGGCCGAGTTCAAGA     | c62821-62804     |
| 41 | merR-303F            | Multidrug-resistant region | GACTTGGCGCGCATGGAAAC   | 68233-68252      |
| 42 | pCRE623 contig12R    | Multidrug-resistant region | GGATCTAGGTGAAGATCC     | c69795-69778     |
| 43 | TEM-R                | Multidrug-resistant region | TTATCCGCCTCCATCCAGTC   | 70083-70102      |
| 44 | TEM-F                | Multidrug-resistant region | TGGGTGCACGAGTGGGTAC    | c70608-70589     |
| 45 | pCRE623 contig12F    | Multidrug-resistant region | TGGCAGATTCACCGGTGA     | 71665-71682      |
| 46 | trbC_84R             | IncL/M scaffold            | CTGTACGTTCCGGAGTGAG    | 78,573-78,590    |
| 47 | trbB_682F            | IncL/M scaffold            | CCGCTCCTGTACTCGATA     | c78,937-78,920   |
| 48 | pCTX-M3 trbB 789F    | IncL/M scaffold            | ACCAGAAAACGTATTGTGCG   | 79458-79477      |
| 49 | trbA_156R            | IncL/M scaffold            | CGGCAGTACACCGTAGAT     | 80,782-80,799    |
| 50 | trbN_217F            | IncL/M scaffold            | CCAGTGCCTACATCCTCA     | c81,076-81,059   |
| 51 | orf92_696R           | IncL/M scaffold            | GGTGCCATAGCGATTGGT     | 85,448-85,465    |
| 52 | orf99_1160R          | IncL/M scaffold            | AGTTCGTCCGGGGATTCA     | 88,874-88,891    |
| 53 | orf99_F              | IncL/M scaffold            | TCTTCTATCCCTCCGGAG     | c89,391-89,374   |
| 54 | orf103_R             | IncL/M scaffold            | TGCTGACCAGCACCGATA     | 92,505-92,522    |
| 55 | orf104_R             | IncL/M scaffold            | CAGCATGATGCCGGCAAT     | 93,061-93,078    |
| 56 | pCTX-M3 orf27-25888F | IncL/M scaffold            | TCCCTCTGTCAGCATTGACG   | 104719-104738    |
| 57 | pCTX-M3 rmoA-80R     | IncL/M scaffold            | TCCAGTGTGTCCGGGTACG    | 104977-104958    |
| 58 | orf124_F             | IncL/M scaffold            | ATCTCGACTATCGCCCTG     | 105,526-105,543  |
| 59 | orf125_R             | IncL/M scaffold            | ACGCCATAACGGCTGTGT     | c105,937-105,920 |

|    |             |                 |                    |                  |
|----|-------------|-----------------|--------------------|------------------|
| 60 | traI_23F    | IncL/M scaffold | TCTGACGTTACCGCTGCT | 113,371-113,379  |
| 61 | traI_432R   | IncL/M scaffold | CCCGGTCAGAAGATAGCT | c113,779-113,762 |
| 62 | pri_3037F   | IncL/M scaffold | ACGGATACGGCCATGTTG | 118,613-118,630  |
| 63 | traL_119R   | IncL/M scaffold | TCGTATGCTGCACAGGTC | c118,917-118,900 |
| 64 | orf141_608F | IncL/M scaffold | CCTGTCCAGGTTATGGAC | c119,566-119,583 |
| 65 | traM_151R   | IncL/M scaffold | GGGCGTTGCTGTCATCAT | c120,055-120,038 |
| 66 | traP_347F   | IncL/M scaffold | GCTGGACGCGATAGAATC | 123,567-123,584  |
| 67 | traP_637R   | IncL/M scaffold | CGCCAAGTTGACTACCGA | c123,856-123,839 |

\*These primers can be mapped to more than one location in pIMP-HB623. These include IS110-942F (position c69384-69367); IS5075-340F (68716-68735); Int461F (c52060-52041); IntF (c52511-52492); IncN repE 22-F (43517-43536).

**Table S3.** Backbone differences between pIMP-HB623, pEL1573 and pCTX-M3

| Position in pIMP-HB623 <sup>a</sup> | Nucleotide in pIMP-HB623 (KM877517)               | Nucleotide in pEL1573 (JX101693) <sup>b</sup>     | Nucleotide in pCTX-M3 (AF550415) <sup>b</sup> |
|-------------------------------------|---------------------------------------------------|---------------------------------------------------|-----------------------------------------------|
| 113,651                             | G                                                 | <b>A</b>                                          | G                                             |
| 118,690                             | C                                                 | <b>A</b>                                          | C                                             |
| 123,762                             | T                                                 | <b>G</b>                                          | T                                             |
| 78,796                              | G                                                 | G                                                 | <b>T</b>                                      |
| 78,798                              | G                                                 | G                                                 | <b>C</b>                                      |
| 80,960                              | A                                                 | A                                                 | <b>G</b>                                      |
| 85,538-85,539                       | 1 base deletion                                   | 1 base deletion                                   | <b>G</b>                                      |
| 85,551-85,552                       | 2 bases deletion                                  | 2 bases deletion                                  | <b>GC</b>                                     |
| 89,195                              | G                                                 | G                                                 | <b>T</b>                                      |
| 92,828                              | C                                                 | C                                                 | <b>A</b>                                      |
| 105,765                             | G                                                 | G                                                 | <b>A</b>                                      |
| 116,878-116,922                     | ACCCCTGCAGCTGCTGAAGCGGTGGA<br>AGCCGCGCCGGTGGCCAGC | ACCCCTGCAGCTGCTGAAGCGGTGGA<br>AGCCGCGCCGGTGGCCAGC | <b>45 bases deletion</b>                      |
| 119,808                             | T                                                 | T                                                 | <b>C</b>                                      |
| 119,826                             | G                                                 | G                                                 | <b>A</b>                                      |

<sup>a</sup>According to numbering in GenBank accession KM877517

<sup>b</sup>Differences with pIMP-HB623 are indicated in boldface.

### References

1. **CLSI.** *Performance standards for antimicrobial susceptibility testing: twenty-fourth informational supplement M100-S24.* 2014. CLSI, Wayne, PA, USA, 2014.
